# Supplementary material for: Consumption of sheep milk compared to cow milk can affect trabecular bone ultrastructure in a rat model
Source: Royal Society of Chemistry journal article supplement (doi:10.1039/c8fo01598h), 2018-11-29
Supplement: c8fo01598h1.pdf [file c8fo01598h1.pdf]

Table S1: Parameters determined in cortical and trabecular bone using  $\mu$ -CT analysis (derived from Bouxsein et al.<sup>16</sup>)

| Characteristic                                  | Abbreviation | Bone Type  | Unit                             | Description                                                                                                                                                  | Desirability in relation to bone health |
|-------------------------------------------------|--------------|------------|----------------------------------|--------------------------------------------------------------------------------------------------------------------------------------------------------------|-----------------------------------------|
| Bone volume                                     | BV           | Cortical   | mm <sup>3</sup>                  | Volume of the region identified as bone within the area assessed                                                                                             | ↑ Desirable                             |
| Bone surface                                    | BS           |            | mm <sup>2</sup>                  | Surface area of the region identified as bone within area assessed                                                                                           |                                         |
| Bone surface to volume ratio                    | BS/BV        |            | mm <sup>2</sup> /mm <sup>3</sup> | Ratio between the surface of the area identified as bone and the total volume of that area                                                                   |                                         |
| Bone surface density                            | BSD          |            | mm <sup>2</sup> /mm <sup>3</sup> | Ratio between the region identified as bone to the total volume of the region assessed                                                                       |                                         |
| Number of pores                                 | PN           |            | number                           | Total number of all closed pores within the area assessed                                                                                                    |                                         |
| Volume of pores                                 | PV           |            | mm <sup>3</sup>                  | Total volume of all closed and closed pores within the area assessed                                                                                         | ↑ Undesirable                           |
| Percentage porosity                             | P %          |            | %                                | The volume of all closed as a percent of the total volume assessed                                                                                           |                                         |
| Bone volume                                     | BV/TV        | Trabecular | %                                | Volume of the region identified as bone within the area assessed                                                                                             | ↑ Desirable                             |
| Bone surface density                            | BS/TV        |            | mm <sup>2</sup> /mm <sup>3</sup> | Ratio between the region identified as bone to the total volume of the region assessed                                                                       |                                         |
| Bone surface to volume ratio                    | BS/BV        |            | mm <sup>2</sup> /mm <sup>3</sup> | Ratio between the surface of the area identified as bone and the total volume of that area                                                                   |                                         |
| Trabecular pattern factor (fragmentation index) | Tb.Pf        |            | N/A*                             | An inverse measure of connectivity within the trabecular bone                                                                                                | ↑ Undesirable                           |
| Trabecular thickness                            | Tb.Th        |            | mm                               | Mean thickness of trabeculae                                                                                                                                 | ↑ Desirable                             |
| Trabecular separation                           | Tb.Ts        |            | mm                               | Mean distance between trabeculae                                                                                                                             |                                         |
| Trabecular number                               | Tb.N         |            | 1/mm                             | The average number of trabeculae in a given length of bone                                                                                                   |                                         |
| Degree of anisotropy                            | DA           |            | N/A*                             | A measure of measure of 3D symmetry from 1 to infinity with 1 means full isotropic (homogenous) characteristic and infinity full anisotropic characteristics | ↑ Undesirable                           |
| Fractional Dimension                            | FD           |            | N/A*                             | Indicator of surface complexity                                                                                                                              | ↑ Desirable                             |

\* Unit-less measurement

Table S2: ICP-MS detection limits

| Element | Detection limit (mg/kg) |
|---------|-------------------------|
| Ag      | 0.05                    |
| Al      | 10                      |
| As      | 0.1                     |
| Ba      | 0.04                    |
| Ca      | 200                     |
| Cd      | 0.1                     |
| Ce      | 0.02                    |
| Co      | 0.04                    |
| Cr      | 0.3                     |
| Cs      | 0.02                    |
| Cu      | 0.2                     |
| Dy      | 0.02                    |
| Er      | 0.01                    |
| Eu      | 0.01                    |
| Fe      | 2                       |
| Gd      | 0.03                    |
| Ho      | 0.005                   |
| K       | 120                     |
| La      | 0.01                    |
| Lu      | 0.01                    |
| Mg      | 44                      |
| Mn      | 0.1                     |
| Mo      | 0.04                    |
| Na      | 40                      |
| Nd      | 0.02                    |
| Ni      | 0.1                     |
| P       | 100                     |
| Pb      | 0.1                     |
| Pr      | 0.01                    |
| Rb      | 0.04                    |
| Sb      | 0.04                    |
| Se      | 0.2                     |
| Sm      | 0.04                    |
| Sr      | 0.04                    |
| Tm      | 0.01                    |
| U       | 0.02                    |
| V       | 0.3                     |
| Y       | 0.02                    |
| Yb      | 0.01                    |
| Zn      | 20                      |

Table S3: Macro-composition of the components of diets fed to rats (percentage composition, wet weight)<sup>#</sup>

| Fraction      | AIN-93M diet* | CM** | SM** |
|---------------|---------------|------|------|
| Protein       | 14            | 3.59 | 5.65 |
| Lipids        | 4             | 5.27 | 7.07 |
| Carbohydrates | 76            | -    | -    |
| Lactose       | -             | 4.38 | 5.37 |

\*The macro-composition of the AIN-93M diet as reported by the supplier. \*\*The lipid and total nitrogen content of the milk samples was determined using the methods of the Association of Official Analytical Chemists<sup>23, 24</sup>, the lactose content was determined using a Milkoscan<sup>TM</sup>. <sup>#</sup> As reported in Burrow et al.<sup>22</sup>. CM= cow milk, and SM= undiluted sheep milk

Table S4: Trabecular characteristics of rat femora determined by  $\mu$ -CT scanning and analysis (mean  $\pm$  standard deviation).

| Diet      | Unit | CM               | DM               | SM               |
|-----------|------|------------------|------------------|------------------|
| Parameter |      |                  |                  |                  |
| BV/TV     | %    | 53.8 $\pm$ 1.82  | 53.5 $\pm$ 2.10  | 52.5 $\pm$ 1.44  |
| Tb.Pf     | N/A* | -19.1 $\pm$ 3.90 | -15.3 $\pm$ 4.00 | -16.7 $\pm$ 2.00 |
| Tb.N      | mm   | 1.59 $\pm$ 0.43  | 1.80 $\pm$ 0.28  | 1.84 $\pm$ 0.19  |
| Tb.Ts     | 1/mm | 0.24 $\pm$ 0.07  | 0.22 $\pm$ 0.03  | 0.20 $\pm$ 0.02  |
| FD        | N/A* | 2.55 $\pm$ 0.03  | 2.50 $\pm$ 0.06  | 2.53 $\pm$ 0.06  |
| DA        | N/A* | 1.69 $\pm$ 0.27  | 1.63 $\pm$ 0.26  | 1.59 $\pm$ 0.17  |

\* Unit-less measurement. CM= cow milk, DM= sheep milk diluted to have the same concentration of milk solids as raw cow milk, and SM= undiluted sheep milk

Table S5: Cortical characteristics of rat femora determined by  $\mu$ -CT scanning and analysis (mean  $\pm$  standard deviation).

| Diet      | Unit                             | CM                | DM                | SM                |
|-----------|----------------------------------|-------------------|-------------------|-------------------|
| Parameter |                                  |                   |                   |                   |
| BV        | mm <sup>3</sup>                  | 9.36 $\pm$ 0.45   | 10.3 $\pm$ 0.28   | 10.3 $\pm$ 0.62   |
| BS        | mm <sup>2</sup>                  | 95.5 $\pm$ 5.44   | 108 $\pm$ 3.14    | 108 $\pm$ 7.36    |
| BS/BV     | mm <sup>2</sup> /mm <sup>3</sup> | 10.2 $\pm$ 0.34   | 10.4 $\pm$ 0.24   | 10.5 $\pm$ 0.26   |
| BSD       | mm <sup>2</sup> /mm <sup>3</sup> | 4.75 $\pm$ 0.17   | 4.85 $\pm$ 0.12   | 4.81 $\pm$ 0.13   |
| PN        | number                           | 72.5 $\pm$ 7.83   | 68.6 $\pm$ 11.9   | 61.3 $\pm$ 7.44   |
| PV        | mm <sup>3</sup>                  | 0.006 $\pm$ 0.001 | 0.006 $\pm$ 0.001 | 0.008 $\pm$ 0.003 |
| P %       | %                                | 0.06 $\pm$ 0.01   | 0.05 $\pm$ 0.01   | 0.07 $\pm$ 0.03   |

CM= cow milk, DM= sheep milk diluted to have the same concentration of milk solids as raw cow milk, and SM= undiluted sheep milk
